# Supplementary material for: Phytochemical Compounds and Anticancer Activity of Cladanthus mixtus Extracts from Northern Morocco
Source: MDPI journal article supplement (doi:10.3390/cancers15010152), 2022-12-27
Supplement: s1 [file s1]

## SUPPLEMENTAL INFORMATION

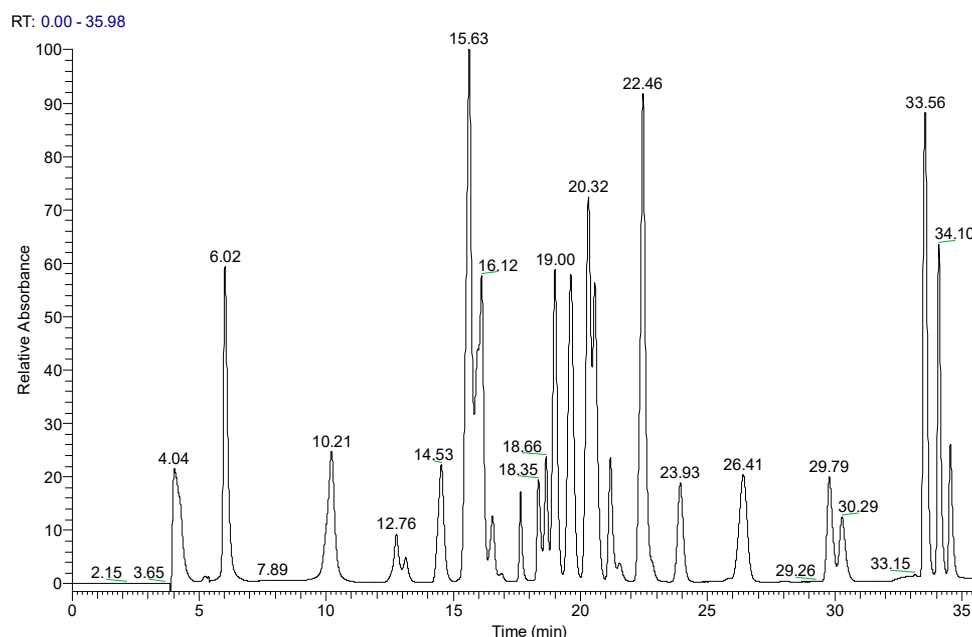

**Figure S1.** LC–MS chromatogram of standards phenolic compounds in the methanol–water.

**Table S1.** Standards used to identify and quantify phenolic compounds in *Cladanthus mixtus*.

| Peak | Phenolic compound      | Retention time<br>(min) | Masse (m/z) | Calibration curve            | Coefficient of deter-<br>mination (R2) |
|------|------------------------|-------------------------|-------------|------------------------------|----------------------------------------|
| 1    | Gallic acid            | 6,02                    | 169,43      | $Y = 52,23 \cdot X - 127,5$  | 0,9978                                 |
| 2    | Protocatechuic acid    | 10,21                   | 153,46      | $Y = 34,24 \cdot X - 22,30$  | 0,9994                                 |
| 3    | Chlorogenic acid       | 12,76                   | 353,05      | $Y = 9,013 \cdot X - 21,10$  | 0,9977                                 |
| 4    | Catechin               | 13,13                   | 289,31      | $Y = 3,962 \cdot X + 0,5337$ | 0,9994                                 |
| 5    | p-hydroxybenzoïc acid  | 14,53                   | 137,43      | $Y = 24,77 \cdot X - 9,242$  | 0,9987                                 |
| 6    | Caffeic acid           | 15,63                   | 179,41      | $Y = 97,26 \cdot X + 142,7$  | 0,999                                  |
| 7    | Vanillic acid          | 15,97                   | 167,00      | $Y = 29,39 \cdot X + 16,70$  | 0,9987                                 |
| 8    | Syringic acid          | 16,12                   | 197,00      | $Y = 44,26 \cdot X + 26,40$  | 0,9997                                 |
| 9    | Rutin                  | 17,65                   | 609,18      | $Y = 8,200 \cdot X - 1,036$  | 0,999                                  |
| 10   | Ellagic acid           | 18,35                   | 301,22      | $Y = 12,18 \cdot X + 54,35$  | 0,9982                                 |
| 11   | Luteolin-7-O-glucoside | 18,66                   | 447,00      | $Y = 14,78 \cdot X + 3,791$  | 0,9992                                 |
| 12   | p-Coumaric acid        | 19,00                   | 164,00      | $Y = 50,04 \cdot X - 48,94$  | 0,9986                                 |
| 13   | Vanillin               | 19,63                   | 151,20      | $Y = 61,85 \cdot X - 25,55$  | 0,9984                                 |
| 14   | Ferulic acid           | 20,32                   | 193,00      | $Y = 65,81 \cdot X - 93,12$  | 0,9982                                 |
| 15   | Naringin               | 20,57                   | 579,31      | $Y = 47,61 \cdot X - 38,64$  | 0,9987                                 |
| 16   | Apigenin-7-O-glucoside | 21,18                   | 431,22      | $Y = 17,00 \cdot X - 3,910$  | 0,9983                                 |
| 17   | Rosmarinic acid        | 22,46                   | 359,10      | $Y = 87,94 \cdot X - 5,717$  | 0,9993                                 |
| 18   | Salicylic acid         | 23,93                   | 137,16      | $Y = 19,27 \cdot X + 1,614$  | 0,9992                                 |
| 19   | Methyl paraben         | 26,41                   | 151,53      | $Y = 29,78 \cdot X + 0,7684$ | 0,9991                                 |
| 20   | Luteolin               | 29,79                   | 285,35      | $Y = 20,42 \cdot X - 15,82$  | 0,9983                                 |
| 21   | Quercetin              | 30,29                   | 301,00      | $Y = 13,50 \cdot X - 5,296$  | 0,999                                  |

|    |              |       |        |                             |        |
|----|--------------|-------|--------|-----------------------------|--------|
| 22 | Apigenin     | 33,56 | 269,69 | $Y = 66,91 \cdot X + 41,21$ | 0,9993 |
| 23 | Kaempferol   | 34,10 | 285,45 | $Y = 38,06 \cdot X - 21,28$ | 0,9988 |
| 24 | Isorhamnetin | 34,55 | 315,26 | $Y = 15,74 \cdot X + 19,51$ | 0,9993 |

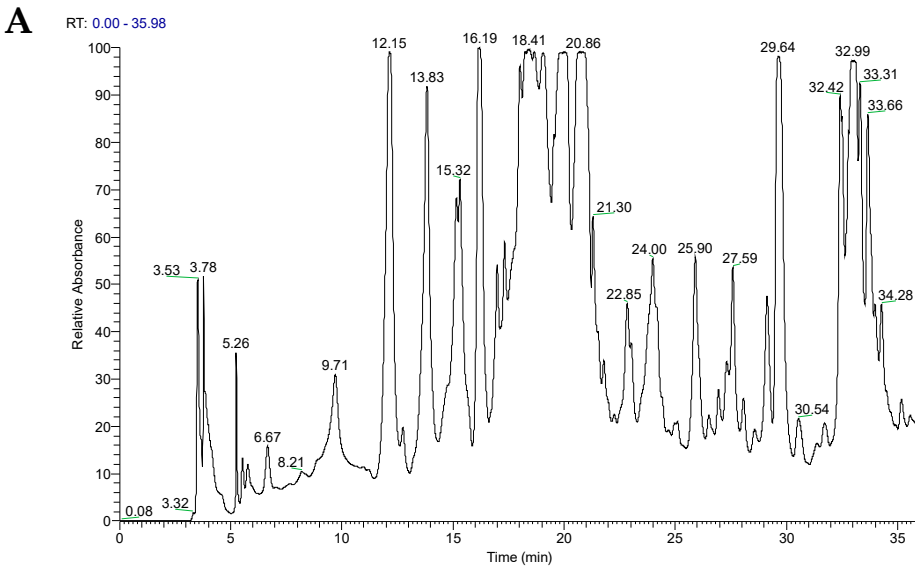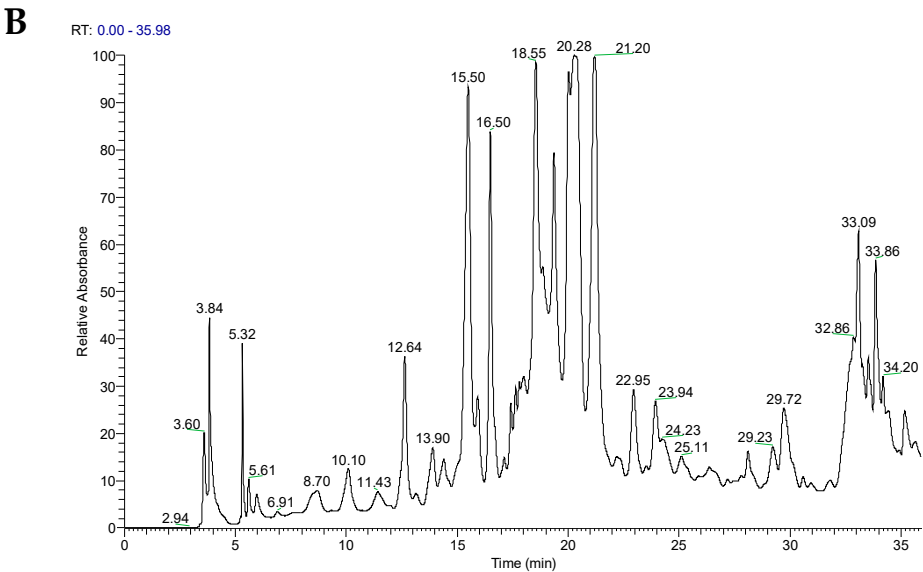

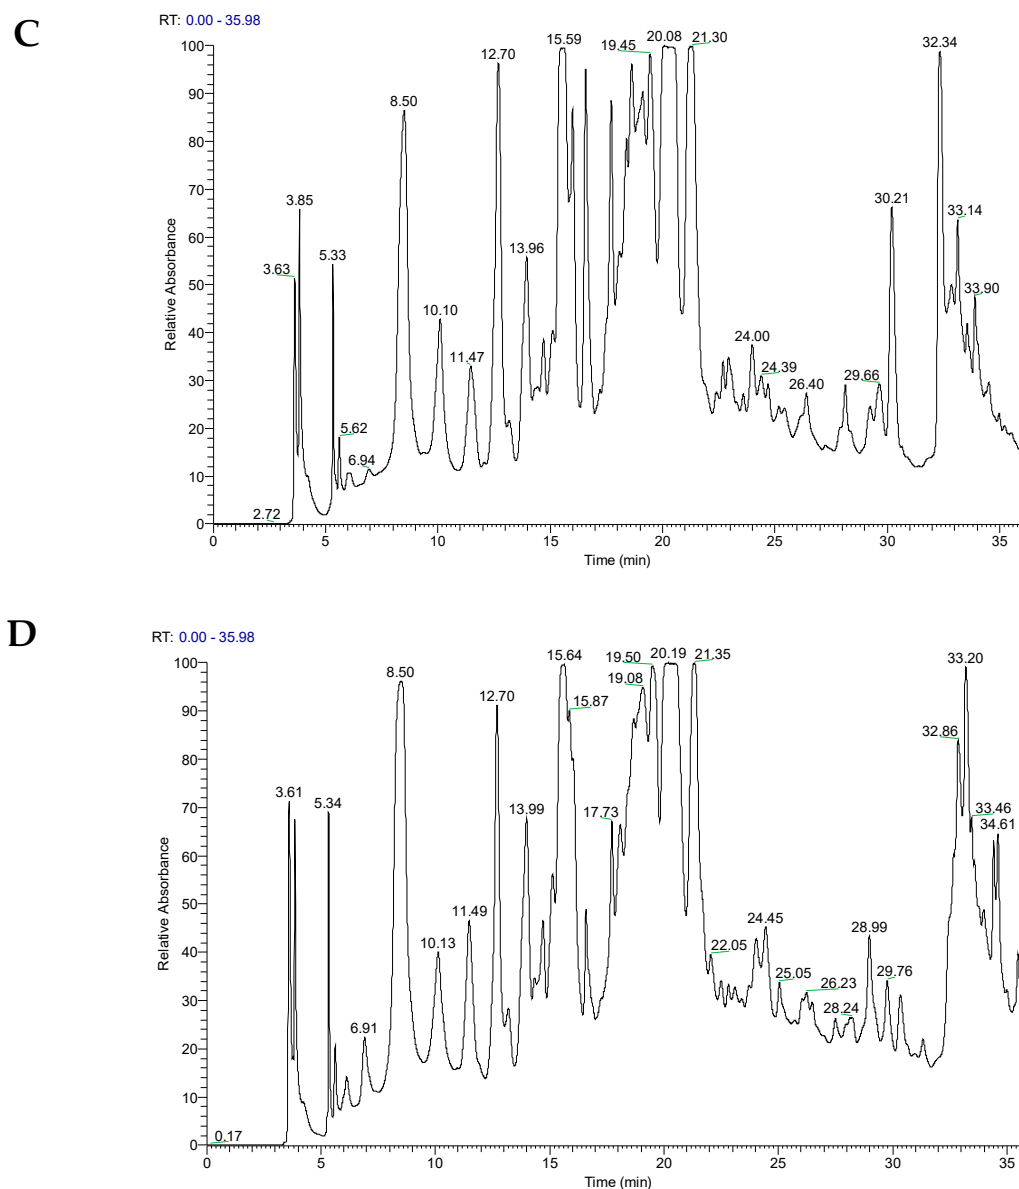

**Figure S2.** HPLC-MS chromatograms of *Cladanthus mixtus* extracts as detected at 280 nm  
(A) flowers, (B) leaves, (C) stems, (D) roots.

**Table S2:** Chemical composition of terpenoids obtained by GC-MS.

| Molecules           | Chemical formula                  | Molecular weight | Area (%)       |               |              |              |
|---------------------|-----------------------------------|------------------|----------------|---------------|--------------|--------------|
|                     |                                   |                  | Flowers (CM-F) | Leaves (CM-L) | Stems (CM-S) | Roots (CM-R) |
| $\beta$ -sitosterol | C <sub>29</sub> H <sub>50</sub> O | 414.7            | 6.25           | --            | --           | --           |
| Lupeol              | C <sub>30</sub> H <sub>50</sub> O | 426.7            | --             | 14.66         | --           | 8.69         |
| Phytol              | C <sub>20</sub> H <sub>40</sub> O | 296.5            | --             | 11.39         | 6.41         | 0.97         |
| Eucalyptol          | C <sub>10</sub> H <sub>18</sub> O | 154.2            | 0.48           | 3.95          | 2.83         | 1.22         |
| Campesterol         | C <sub>28</sub> H <sub>48</sub> O | 400.7            | 2.81           | 1.28          | --           | --           |
| Taraxasterol        | C <sub>30</sub> H <sub>50</sub> O | 426.7            | 0.87           | --            | --           | --           |

|                                                                 |                                                |       |       |       |       |       |
|-----------------------------------------------------------------|------------------------------------------------|-------|-------|-------|-------|-------|
| 2,6-Octadienal, 2,6-dimethyl-8-(tetrahydro-2H-2-pyran-2-yl-oxo) | C <sub>15</sub> H <sub>24</sub> O <sub>3</sub> | 252.3 | --    | 6.88  | --    | --    |
| Neophytadiene                                                   | C <sub>20</sub> H <sub>38</sub>                | 278.5 | --    | 2.16  | --    | --    |
| Tetradecane, 2,6,10-trimethyl                                   | C <sub>17</sub> H <sub>36</sub>                | 240.5 | --    | 2.38  | --    | --    |
| Pentadecan-2-one, 6,10,14-trimethyl                             | C <sub>18</sub> H <sub>36</sub> O              | 268.5 | --    | 1.93  | 0.85  | --    |
| Isoshyobunone                                                   | C <sub>15</sub> H <sub>24</sub> O              | 220.3 | --    | 1.00  | --    | --    |
| Caryophyllene oxide                                             | C <sub>15</sub> H <sub>24</sub> O              | 220.3 | --    | 0.57  | --    | --    |
| (3 $\alpha$ )-D:A-Friedooleanan-3-ol                            | C <sub>30</sub> H <sub>52</sub> O              | 428.7 | --    | --    | 1.23  | --    |
| <b>Total</b>                                                    |                                                |       | 10.41 | 46.20 | 11.32 | 10.88 |

(--) : Not detected

**Table S3:** Chemical composition of esters obtained by GC-MS.

| Molecules                                                              | Chemical formula                                | Molecular weight | Flowers (CM-F) | Area (%)      |              |              |
|------------------------------------------------------------------------|-------------------------------------------------|------------------|----------------|---------------|--------------|--------------|
|                                                                        |                                                 |                  |                | Leaves (CM-L) | Stems (CM-S) | Roots (CM-R) |
| Palmitic acid $\beta$ -monoglyceride                                   | C <sub>19</sub> H <sub>38</sub> O <sub>4</sub>  | 330.5            | 7.88           | 6.32          | 15.66        | 13.08        |
| Stearic acid $\beta$ -monoglyceride                                    | C <sub>21</sub> H <sub>42</sub> O <sub>4</sub>  | 358.6            | 3.29           | 3.21          | 4.00         | 5.57         |
| Palmitic acid, methyl ester                                            | C <sub>17</sub> H <sub>34</sub> O <sub>2</sub>  | 270.5            | 1.02           | --            | 2.33         | 1.63         |
| Linoleic acid, methyl ester                                            | C <sub>19</sub> H <sub>34</sub> O <sub>2</sub>  | 294.5            | 0.92           | --            | --           | --           |
| Oleic acid, methyl ester                                               | C <sub>19</sub> H <sub>36</sub> O <sub>2</sub>  | 296.4            | 0.77           | --            | --           | --           |
| l-Norvaline, N-ethoxycarbonyl-, hexadecyl ester                        | C <sub>24</sub> H <sub>47</sub> NO <sub>4</sub> | 413.6            | --             | --            | 3.49         | --           |
| l-Proline, N-allyloxycarbonyl-, undec-10-enyl ester                    | C <sub>20</sub> H <sub>33</sub> NO <sub>4</sub> | 351.5            | --             | --            | 2.98         | --           |
| Diisooctyl phthalate                                                   | C <sub>24</sub> H <sub>38</sub> O <sub>4</sub>  | 390.6            | --             | --            | 1.65         | --           |
| Artemisyl acetate                                                      | C <sub>12</sub> H <sub>20</sub> O <sub>2</sub>  | 196.3            | --             | 2.47          | --           | --           |
| Phytyl decanoate                                                       | C <sub>30</sub> H <sub>58</sub> O <sub>2</sub>  | 450.8            | --             | 0.82          | --           | --           |
| Carbonic acid                                                          | C <sub>3</sub> H <sub>4</sub> O <sub>3</sub>    | 88.0             | --             | 0.39          | --           | --           |
| 2-Mercapto-2-methyl-propionic acid                                     | C <sub>4</sub> H <sub>8</sub> O <sub>2</sub> S  | 120.1            | --             | --            | --           | 1.09         |
| Benzoic acid, 4-butoxy-3-methoxy-perhydro-1-quinoliziny-1-methyl ester | C <sub>22</sub> H <sub>33</sub> NO <sub>4</sub> | 375.5            | --             | --            | --           | 0.54         |
| <b>Total</b>                                                           |                                                 |                  | 13.88          | 13.21         | 30.11        | 21.91        |

(--) : Not detected

**Table S4:** Chemical composition of alcohols obtained by GC-MS.

| Molecules                        | Chemical formula                               | Molecular weight | Flowers (CM-F) | Area (%)      |              |              |
|----------------------------------|------------------------------------------------|------------------|----------------|---------------|--------------|--------------|
|                                  |                                                |                  |                | Leaves (CM-L) | Stems (CM-S) | Roots (CM-R) |
| Ethyl iso-allocholate            | C <sub>26</sub> H <sub>44</sub> O <sub>5</sub> | 436.6            | --             | --            | --           | 23.28        |
| 2,3-Dimethyl-3-pentanol          | C <sub>7</sub> H <sub>16</sub> O               | 116.2            | --             | --            | --           | 0.87         |
| 1-Hexadecanol                    | C <sub>16</sub> H <sub>34</sub> O              | 242.4            | --             | --            | --           | 0.34         |
| Diallyl methyl carbinol          | C <sub>8</sub> H <sub>14</sub> O               | 126.2            | --             | 5.39          | --           | --           |
| 2-Methyl-Z,Z-3,13-octadecadienol | C <sub>19</sub> H <sub>36</sub> O              | 280.5            | --             | 1.09          | --           | --           |

|                                                  |                                                |       |    |      |      |       |
|--------------------------------------------------|------------------------------------------------|-------|----|------|------|-------|
| 1-Methylcycloheptanol                            | C <sub>8</sub> H <sub>16</sub> O               | 128.2 | -- | 0.26 | --   | --    |
| 1-Cyclohexanol, 1-[5-hydroxy-4-methyl-2-hexenyl] | C <sub>13</sub> H <sub>24</sub> O <sub>2</sub> | 212.3 | -- | --   | 3.98 | --    |
| 5-Azacyclodecanol                                | C <sub>9</sub> H <sub>19</sub> NO              | 157.2 | -- | --   | 1.07 | --    |
| <b>Total</b>                                     |                                                |       | -- | 6.74 | 5.05 | 24.49 |

(--) : Not detected

**Table S5:** Chemical composition of alkanes obtained by GC-MS.

| Molecules                                        | Chemical formula                  | Molecular weight | Flowers (CM-F) | Leaves (CM-L) | Area (%)     |              |
|--------------------------------------------------|-----------------------------------|------------------|----------------|---------------|--------------|--------------|
|                                                  |                                   |                  |                |               | Stems (CM-S) | Roots (CM-R) |
| Eicosane                                         | C <sub>20</sub> H <sub>42</sub>   | 282.5            | 13.46          | 2.14          | 1.97         | --           |
| Octadecane, 5,14-dibutyl-                        | C <sub>26</sub> H <sub>54</sub>   | 366.7            | 0.23           | --            | --           | --           |
| Tetracosane                                      | C <sub>24</sub> H <sub>50</sub>   | 338.7            | 0.47           | --            | --           | --           |
| 3-Methylpentacosane                              | C <sub>26</sub> H <sub>54</sub>   | 366.7            | 0.30           | --            | --           | --           |
| 9-Octylhexacosane                                | C <sub>34</sub> H <sub>70</sub>   | 478.9            | 0.68           | --            | --           | --           |
| Cyclohexane, (1,1-dimethyl-propyl)-              | C <sub>11</sub> H <sub>22</sub>   | 154.2            | --             | 0.49          | --           | --           |
| 1,3,5-Trimethyl-2-octadecyl-cyclohexane          | C <sub>27</sub> H <sub>54</sub>   | 378.7            | --             | --            | 6.17         | 2.26         |
| 6,6-Dimethyl-10-methylene-1-oxa-spiro[4.5]decane | C <sub>12</sub> H <sub>20</sub> O | 180.2            | --             | --            | 5.57         | --           |
| 10-Methyleicosane                                | C <sub>21</sub> H <sub>44</sub>   | 296.6            | --             | --            | 2.24         | --           |
| 11-Decyltetracosane                              | C <sub>34</sub> H <sub>70</sub>   | 478.9            | --             | --            | 2.18         | --           |
| Tritetracontane                                  | C <sub>43</sub> H <sub>88</sub>   | 605.2            | --             | --            | --           | 0.88         |
| <b>Total</b>                                     |                                   |                  | 15.14          | 2.63          | 18.13        | 3.14         |

(--) : Not detected

**Table S6:** Chemical composition of fatty acid obtained by GC-MS.

| Molecules                            | Chemical formula                               | Molecular weight | Flowers (CM-F) | Leaves (CM-L) | Area (%)     |              |
|--------------------------------------|------------------------------------------------|------------------|----------------|---------------|--------------|--------------|
|                                      |                                                |                  |                |               | Stems (CM-S) | Roots (CM-R) |
| (Z)-18-Octadec-9-enolide             | C <sub>18</sub> H <sub>32</sub> O <sub>2</sub> | 280.4            | 12.69          | --            | --           | --           |
| Palmitic acid                        | C <sub>16</sub> H <sub>32</sub> O <sub>2</sub> | 256.4            | 9.1            | 11.39         | --           | --           |
| γ-Stearolactone                      | C <sub>18</sub> H <sub>34</sub> O <sub>2</sub> | 282.5            | 3.8            | --            | --           | --           |
| (Z)-13-Docosenamide                  | C <sub>22</sub> H <sub>43</sub> NO             | 337.6            | 1.17           | --            | 6.18         | 8.23         |
| Capric acid                          | C <sub>10</sub> H <sub>20</sub> O <sub>2</sub> | 172.2            | 1.1            | --            | --           | --           |
| (E)-3-methoxy-4-nitro-2-butenic acid | C <sub>5</sub> H <sub>7</sub> NO <sub>5</sub>  | 161.1            | --             | 0.49          | --           | --           |
| <b>Total</b>                         |                                                |                  | 27.86          | 11.88         | 6.18         | 8.23         |

(--) : Not detected

**Table S7:** Chemical composition of organic acids obtained by GC-MS.

| Molecules                | Chemical formula                                            | Molecular weight | Flowers (CM-F) | Leaves (CM-L) | Area (%)     |              |
|--------------------------|-------------------------------------------------------------|------------------|----------------|---------------|--------------|--------------|
|                          |                                                             |                  |                |               | Stems (CM-S) | Roots (CM-R) |
| Oxalic acid, dihydrazide | C <sub>2</sub> H <sub>6</sub> N <sub>4</sub> O <sub>2</sub> | 118.1            | 1.88           | 0.51          | 2.74         | 3.47         |

|                                         |                                                   |       |      |      |      |      |
|-----------------------------------------|---------------------------------------------------|-------|------|------|------|------|
| 2,5-Furandione, 3-(2-decenyl)dihydro-   | C <sub>14</sub> H <sub>22</sub> O <sub>3</sub>    | 238.3 | 0.64 | --   | --   | --   |
| 3-Methylbutanoic acid                   | C <sub>5</sub> H <sub>10</sub> O <sub>2</sub>     | 102.1 | --   | --   | --   | 1.23 |
| 1-Propylheptyl ethylphosphonofluoridate | C <sub>12</sub> H <sub>26</sub> FO <sub>2</sub> P | 252.3 | --   | 1.16 | --   | --   |
| 3-Methylcyclopentyl acetate             | C <sub>8</sub> H <sub>14</sub> O <sub>2</sub>     | 142.2 | --   | 0.18 | --   | --   |
| <b>Total</b>                            |                                                   |       | 3.07 | 1.85 | 2.74 | 4.70 |

(--) : Not detected

**Table S8:** Chemical composition of benzene and its derivatives obtained by GC-MS.

| Molecules                                           | Chemical formula                                | Molecular weight | Flowers (CM-F) | Area (%)      |              |              |
|-----------------------------------------------------|-------------------------------------------------|------------------|----------------|---------------|--------------|--------------|
|                                                     |                                                 |                  |                | Leaves (CM-L) | Stems (CM-S) | Roots (CM-R) |
| 1-Nitro-3-(propoxy-methyl)benzene                   | C <sub>10</sub> H <sub>13</sub> NO <sub>3</sub> | 195.2            | --             | --            | --           | 8.15         |
| Loliolide                                           | C <sub>11</sub> H <sub>16</sub> O <sub>3</sub>  | 196.2            | 1.64           | 3.53          | 3.28         | --           |
| Benzaldehyde, 4-methyl-                             | C <sub>8</sub> H <sub>8</sub> O                 | 120.1            | --             | --            | 2.45         | --           |
| ethyl 3,4-dihydro-1H-isochromene-1-carboxylate      | C <sub>12</sub> H <sub>14</sub> O <sub>3</sub>  | 206.2            | 1.21           | --            | --           | --           |
| (3-Nitrophenyl) methanol, 3-methylbutyl ether       | C <sub>12</sub> H <sub>17</sub> NO <sub>3</sub> | 223.2            | --             | 2.85          | --           | --           |
| 5,5,8a-Trimethyl-3,5,6,7,8,8a-hexahydro-2H-chromene | C <sub>12</sub> H <sub>20</sub> O               | 180.2            | --             | 1.24          | --           | --           |
| <b>Total</b>                                        |                                                 |                  | 2.85           | 7.62          | 5.73         | 8.15         |

(--) : Not detected

**Table S9:** Chemical composition of phenols obtained by GC-MS.

| Molecules                                             | Chemical formula                                   | Molecular weight | Flowers (CM-F) | Area (%)      |              |              |
|-------------------------------------------------------|----------------------------------------------------|------------------|----------------|---------------|--------------|--------------|
|                                                       |                                                    |                  |                | Leaves (CM-L) | Stems (CM-S) | Roots (CM-R) |
| Vanillin                                              | C <sub>8</sub> H <sub>8</sub> O <sub>3</sub>       | 152.1            | --             | --            | --           | 4.21         |
| 2-Methoxy-4-vinylphenol                               | C <sub>9</sub> H <sub>10</sub> O <sub>2</sub>      | 150.1            | --             | 0.52          | --           | 1.28         |
| Phenol, 2,6-dimethoxy-                                | C <sub>8</sub> H <sub>10</sub> O <sub>3</sub>      | 154.1            | --             | --            | --           | 0.51         |
| 6-O-Acetyl-1-[[4-bromophenyl] sulfonyl]-β-D-glucoside | C <sub>14</sub> H <sub>17</sub> BrO <sub>8</sub> S | 425.2            | --             | --            | 1.61         | --           |
| 4-Hydroxy-2-methylacetophenone                        | C <sub>9</sub> H <sub>10</sub> O <sub>2</sub>      | 150.1            | 0.41           | --            | --           | --           |
| <b>Total</b>                                          |                                                    |                  | 0.41           | 0.52          | 1.61         | 6.00         |

(--) : Not detected

**Table S10:** Chemical composition of ketones obtained by GC-MS.

| Molecules                   | Chemical formula                               | Molecular weight | Flowers (CM-F) | Area (%)      |              |              |
|-----------------------------|------------------------------------------------|------------------|----------------|---------------|--------------|--------------|
|                             |                                                |                  |                | Leaves (CM-L) | Stems (CM-S) | Roots (CM-R) |
| Cyclobutanone               | C <sub>4</sub> H <sub>6</sub> O                | 70.0             | --             | --            | 2.89         | --           |
| 2-Propanone, 1-phenoxy-     | C <sub>9</sub> H <sub>10</sub> O <sub>2</sub>  | 150.1            | --             | --            | 1.58         | --           |
| Apocynin                    | C <sub>9</sub> H <sub>10</sub> O <sub>3</sub>  | 166.1            | --             | --            | --           | 1.03         |
| 2',5'-Dimethoxyacetophenone | C <sub>10</sub> H <sub>12</sub> O <sub>3</sub> | 180.2            | --             | --            | --           | 0.64         |

|                                                                         |                                                |       |    |      |      |      |
|-------------------------------------------------------------------------|------------------------------------------------|-------|----|------|------|------|
| 2(4H)-Benzofuranone,<br>5,6,7,7a-tetrahydro-4,4,7a-<br>trimethyl-, (R)- | C <sub>11</sub> H <sub>16</sub> O <sub>2</sub> | 180.2 | -- | 1.25 | --   | --   |
| <b>Total</b>                                                            |                                                |       | -- | 1.25 | 4.47 | 1.67 |

(--) : Not detected

**Table S11:** Chemical composition of carbonyls obtained by GC-MS.

| Molecules                         | Chemical formula                  | Molecular weight | Flowers (CM-F) | Leaves (CM-L) | Area (%)     |              |
|-----------------------------------|-----------------------------------|------------------|----------------|---------------|--------------|--------------|
|                                   |                                   |                  |                |               | Stems (CM-S) | Roots (CM-R) |
| 5-Ethyl-4-methyl-3-heptanone      | C <sub>10</sub> H <sub>20</sub> O | 156.2            | 19.27          | --            | --           | --           |
| 4-Heptanol, 4-ethyl-2,6-dimethyl- | C <sub>11</sub> H <sub>24</sub> O | 172.3            | --             | 1.34          | --           | --           |

(--) : Not detected

**Table S12:** Chemical composition of amines obtained by GC-MS.

| Molecules                                                                               | Chemical formula                                              | Molecular weight | Flowers (CM-F) | Leaves (CM-L) | Area (%)     |              |
|-----------------------------------------------------------------------------------------|---------------------------------------------------------------|------------------|----------------|---------------|--------------|--------------|
|                                                                                         |                                                               |                  |                |               | Stems (CM-S) | Roots (CM-R) |
| <i>N</i> -Butylcyclohexylamine                                                          | C <sub>10</sub> H <sub>21</sub> N                             | 155.2            | --             | --            | 6.9          | --           |
| 9-Octadecenamide, (Z)-                                                                  | C <sub>18</sub> H <sub>35</sub> NO                            | 281.5            | --             | 1.67          | --           | --           |
| <i>N</i> -Isobutylideneisobutylamine                                                    | C <sub>8</sub> H <sub>17</sub> N                              | 127.2            | --             | 0.65          | --           | --           |
| 2(Ethylenedioxy)ethylamine, <i>N</i> -methyl- <i>N</i> -[4-(1-pyrrolidinyl)-2-butyryl]- | C <sub>14</sub> H <sub>24</sub> N <sub>2</sub> O <sub>2</sub> | 252.3            | --             | --            | --           | 0.7          |
| 4H-Pyran-4-one, 2,3-dihydro-3,5-dihydroxy-6-methyl-                                     | C <sub>6</sub> H <sub>8</sub> O <sub>4</sub>                  | 144.1            | 1.62           | --            | --           | --           |
| <b>Total</b>                                                                            |                                                               |                  | 1.62           | 2.32          | 6.9          | 0.7          |

(--) : Not detected

**Table S13:** Chemical composition of pyrrolidines obtained by GC-MS.

| Molecules                                                                             | Chemical formula                                 | Molecular weight | Flowers (CM-F) | Leaves (CM-L) | Area (%)     |              |
|---------------------------------------------------------------------------------------|--------------------------------------------------|------------------|----------------|---------------|--------------|--------------|
|                                                                                       |                                                  |                  |                |               | Stems (CM-S) | Roots (CM-R) |
| 2-Hydroxy-1-(1'-pyrrolidiyl)-1-buten-3-one                                            | C <sub>8</sub> H <sub>13</sub> NO <sub>2</sub>   | 155.1            | 0.56           | --            | --           | 0.96         |
| 1-Pyrrolidinylacetonitrile                                                            | C <sub>6</sub> H <sub>10</sub> N <sub>2</sub>    | 110.1            | 0.18           | --            | 0.74         | 0.33         |
| 1-Propanamine, <i>N,N</i> ,2-trimethyl-2-[(2,2,3-trimethyl-1-pyrrolidinyl)oxy]-, (S)- | C <sub>13</sub> H <sub>28</sub> N <sub>2</sub> O | 228.3            | 0.23           | --            | --           | --           |
| 1-(1'-pyrrolidinyl)-2-propanone                                                       | C <sub>7</sub> H <sub>13</sub> NO                | 127.1            | --             | --            | 0.91         | --           |
| Pyrrolidine, <i>N</i> -(3-methyl-3-butenyl)-                                          | C <sub>9</sub> H <sub>17</sub> N                 | 139.2            | --             | 0.22          | 1.39         | --           |
| <b>Total</b>                                                                          |                                                  |                  | 0.97           | 0.22          | 3.04         | 1.29         |

(--) : Not detected

**Table S14:** Chemical composition of pyrimidines and steroids obtained by GC-MS.

| Molecules                                        | Chemical formula                                | Molecular weight | Area (%) |      |      |      |
|--------------------------------------------------|-------------------------------------------------|------------------|----------|------|------|------|
|                                                  |                                                 |                  | Flower   | Leaf | Stem | Root |
| Pyrimidines                                      |                                                 |                  |          |      |      |      |
| 2(1H)-Pyrimidinethione, tetrahydro-1,3-dimethyl- | C <sub>6</sub> H <sub>12</sub> N <sub>2</sub> S | 144.2            | --       | --   | --   | 2.07 |
| Steroids                                         |                                                 |                  |          |      |      |      |
| 2-Methylene-5alpha-cholestan-3beta-ol            | C <sub>28</sub> H <sub>48</sub> O               | 400.7            | --       | 2.32 | --   | --   |
| (--): Not detected                               |                                                 |                  |          |      |      |      |

(--) : Not detected

**Table S15:** Chemical composition of other molecules obtained by GC-MS.

| Molecules                                                          | Chemical formula                                             | Molecular weight | Flower | Area (%) |      |      |
|--------------------------------------------------------------------|--------------------------------------------------------------|------------------|--------|----------|------|------|
|                                                                    |                                                              |                  |        | Leaf     | Stem | Root |
| 5-Piperidin-1-yl-furan-2-carbaldehyde                              | C <sub>10</sub> H <sub>13</sub> NO <sub>2</sub>              | 179.2            | 1.69   | --       | --   | --   |
| 5-(4Nitrophenoxy)methyl furan-2-carbaldehyde)                      | C <sub>12</sub> H <sub>9</sub> NO <sub>5</sub>               | 247.2            | --     | --       | --   | 0.64 |
| 2,3-Dihydrobenzofuran                                              | C <sub>8</sub> H <sub>8</sub> O                              | 120.1            | 1.46   | --       | --   | --   |
| 2-Methylpentadecane-2-thiol                                        | C <sub>16</sub> H <sub>34</sub> S                            | 258.5            | --     | 0.86     | --   | --   |
| Triphenylphosphine oxide                                           | C <sub>18</sub> H <sub>15</sub> OP                           | 278.3            | --     | --       | 3.43 | --   |
| Docosyl octyl ether                                                | C <sub>30</sub> H <sub>62</sub> O                            | 438.8            | --     | 0.62     | --   | --   |
| Butyl(dimethyl)propoxysilane                                       | C <sub>9</sub> H <sub>22</sub> OSi                           | 174.3            | --     | --       | 1.29 | --   |
| Guanine-cytosine                                                   | C <sub>9</sub> H <sub>10</sub> N <sub>8</sub> O <sub>2</sub> | 262.2            | --     | --       | --   | 1.28 |
| Hygrine                                                            | C <sub>8</sub> H <sub>15</sub> NO                            | 141.2            | --     | --       | --   | 0.38 |
| Cycloheptane, 1,2-dichloro-, cis-                                  | C <sub>7</sub> H <sub>12</sub> Cl <sub>2</sub>               | 167.0            | --     | --       | --   | 1.07 |
| Heptadecane, 9-hexyl-                                              | C <sub>23</sub> H <sub>48</sub>                              | 324.6            | --     | --       | --   | 2.79 |
| Normephedrone                                                      | C <sub>10</sub> H <sub>13</sub> NO                           | 163.2            | --     | --       | --   | 0.61 |
| Vinyl decanoate                                                    | C <sub>12</sub> H <sub>22</sub> O <sub>2</sub>               | 198.3            | --     | 0.4      | --   | --   |
| <b>1,5-Heptadiene, 1,5-bis(trimethylsilyl-3-methylene-, 1E,5Z-</b> | C <sub>7</sub> H <sub>12</sub>                               | 96.17            | 1.37   | --       | --   | --   |
| <b>Total</b>                                                       |                                                              |                  | 4.52   | 1.88     | 4.72 | 6.77 |

(--) : Not detected.
